# Supplementary material for: Metal Chelates of Petunidin Derivatives Exhibit Enhanced Color and Stability
Source: PubMed Central journal article supplement (PMC7599678; doi:10.3390/foods9101426), 2020-10-09
Supplement: foods-09-01426-s001.pdf [file foods-09-01426-s001.pdf]

**Supplementary Table 1:** Half-lives (hr) of purple potato petunidin derivatives chelated with  $\text{Al}^{3+}$  and  $\text{Fe}^{3+}$  ions at pH 7 - 9.

|                                    |    | $T_{1/2}$ (HR)      |                   |                    |                  |                  |                   |                   |                   |                    |
|------------------------------------|----|---------------------|-------------------|--------------------|------------------|------------------|-------------------|-------------------|-------------------|--------------------|
|                                    |    | [ $\text{M}^{3+}$ ] |                   |                    |                  |                  |                   |                   |                   |                    |
|                                    | pH | 0 $\mu\text{M}$     | 2.5 $\mu\text{M}$ | 12.5 $\mu\text{M}$ | 25 $\mu\text{M}$ | 50 $\mu\text{M}$ | 125 $\mu\text{M}$ | 250 $\mu\text{M}$ | 750 $\mu\text{M}$ | 1500 $\mu\text{M}$ |
| <b><math>\text{Al}^{3+}</math></b> | 7  | 14.1(0.2)           | 14.1(0.1)         | 14.2(0.1)          | 14.2(0.1)        | 14.6(0.2)        | 14.0(0.1)         | 14.6(0.1)         | 15.9(0.1)         | 17.4(0.1)          |
|                                    | 8  | 44.0(0.8)           | 44.1(1.1)         | 44.5(0.4)          | 43.8(0.9)        | 52.0(1.7)        | 59.4(2.1)         | 116.9(10.5)       | 141.8(3.8)        | 144.1(10.1)        |
|                                    | 9  | 12.9(0.1)           | 13.6(0.4)         | 15.4(0.2)          | 19.5(0.2)        | 19.1(0.1)        | 19.7(1.8)         | 18.9(0.9)         | 19.5(0.1)         | 21.7(2.1)          |
| <b><math>\text{Fe}^{3+}</math></b> | 7  | 14.1(0.2)           | 16.4(0.3)         | 22.5(0.4)          | 27.6(0.4)        | 32.5(0.2)        | 77.9(0.28)        | 61.1(2.4)         | 36.4(0.2)         | 32.3(1.5)          |
|                                    | 8  | 44.0(0.8)           | 43.9(0.3)         | 43.5(1.2)          | 41.5(1.5)        | 98.5(7.2)        | 43.1(2.8)         | 41.9(3.0)         | 36.6(5.3)         | 35.1(5.6)          |
|                                    | 9  | 12.9(0.1)           | 12.9(0.1)         | 13.3(0.2)          | 14.5(0.2)        | 16.0(0.7)        | 10.3(0.2)         | 10.1(0.1)         | 8.9(0.1)          | 7.9(0.4)           |
